# Supplementary material for: The determination of 11 sulfonamide antibiotics in water and foods by developing a N-rich magnetic covalent organic framework combined with ultra-high performance liquid chromatography-tandem mass spectrometry
Source: Royal Society of Chemistry journal article supplement (doi:10.1039/d4ra02530j), 2024-01-01
Supplement: d4ra02530j1.pdf [file d4ra02530j1.pdf]

## Supporting information for

# The determination of 11 sulfonamide antibiotics in water and foods by developing N-rich structure magnetic covalent organic framework combined with ultra-high performance liquid chromatography-tandem mass spectrometry

Ling Ma<sup>a,b,1</sup>, Yue Gu<sup>a,b,1</sup>, Liqiang Guo<sup>c\*</sup>, Ke Wang<sup>a,b\*</sup>

a Shijiazhuang Center for Disease Control and Prevention, Shijiazhuang 050011, China

b Shijiazhuang Technology Innovation Center for Chemical Poison Detection and Risk Early Warning,, Shijiazhuang 050011, China

c Weifang Customs, Weifang 261041, China

<sup>1</sup> *Ling Ma and Yue Gu contributed equally to this manuscript.*

*\* Corresponding authors at: Shijiazhuang Technology Innovation Center for*

*Chemical Poison Detection and Risk Early Warning, Shijiazhuang Center for Disease*

*Control and Prevention, Shijiazhuang, China (K. Wang). Weifang Customs (L. Guo);*

*E-mail addresses: glq1980@sina.com (L. Guo), wkecdc@163.com (K. Wang),*

**Table S1.** The basic properties of 11 sulfonamides antibiotics.

| Sulfonamides antibiotics | CAS       | Molecular formula                                                | Molecular mass | Purity (%) |
|--------------------------|-----------|------------------------------------------------------------------|----------------|------------|
| Sulfamethoxypyridazine   | 80-35-3   | C <sub>11</sub> H <sub>12</sub> N <sub>4</sub> O <sub>3</sub> S  | 280.30         | 99.7       |
| Sulfameter               | 651-06-9  | C <sub>11</sub> H <sub>12</sub> N <sub>4</sub> O <sub>3</sub> S  | 280.30         | 99.0       |
| Sulfamonomethoxine       | 1220-83-3 | C <sub>11</sub> H <sub>12</sub> N <sub>4</sub> O <sub>3</sub> S  | 280.30         | 97.9       |
| Sulfachlorpyridazine     | 80-32-0   | C <sub>10</sub> H <sub>9</sub> ClN <sub>4</sub> O <sub>2</sub> S | 284.72         | 99.1       |
| Sulfadoxine              | 2447-57-6 | C <sub>12</sub> H <sub>14</sub> N <sub>4</sub> O <sub>4</sub> S  | 310.33         | 99.1       |
| Sulfamethoxazole         | 723-46-6  | C <sub>10</sub> H <sub>11</sub> N <sub>3</sub> O <sub>3</sub> S  | 253.28         | 99.5       |
| Sulfisoxazole            | 127-69-5  | C <sub>11</sub> H <sub>13</sub> N <sub>3</sub> O <sub>3</sub> S  | 267.30         | 99.8       |
| Sulfabenzamide           | 127-71-9  | C <sub>13</sub> H <sub>12</sub> N <sub>2</sub> O <sub>3</sub> S  | 276.31         | 99.2       |
| Sulfadimethoxine         | 122-11-2  | C <sub>12</sub> H <sub>14</sub> N <sub>4</sub> O <sub>4</sub> S  | 310.33         | 99.4       |
| Sulfaquinoxaline         | 59-40-5   | C <sub>14</sub> H <sub>12</sub> N <sub>4</sub> O <sub>2</sub> S  | 300.34         | 98.9       |
| Sulfanitran              | 122-16-7  | C <sub>14</sub> H <sub>13</sub> N <sub>3</sub> O <sub>5</sub> S  | 335.34         | 98.9       |

**Table S2.** The mass conditions of 11 sulfonamides antibiotics.

| Compounds              | Retention time (min) | Precursor ion (m/z) | Declustering potential (V) | Product ion (m/z) | Collision energy (eV) |
|------------------------|----------------------|---------------------|----------------------------|-------------------|-----------------------|
| Sulfamethoxypyridazine | 3.20                 | 281.0               | 83.2/77.9                  | 156.2*/92.1       | 24.0/37.9             |
| Sulfameter             | 3.44                 | 281.1               | 55.0/61.1                  | 156.1*/108.2      | 24.9/33.2             |
| Sulfamonomethoxine     | 3.92                 | 281.1               | 56.9/18.1                  | 156.2*/108.2      | 24.2/35.1             |
| Sulfachloropyridazine  | 4.53                 | 285.1               | 82.0/83.1                  | 156.2*/108.1      | 21.6/34.0             |
| Sulfadoxine            | 5.15                 | 311.1               | 82.1/73.1                  | 156.0*/108.1      | 24.1/33.0             |
| Sulfamethoxazole       | 5.24                 | 254.1               | 106.9/84.9                 | 156.1*/108.2      | 22.3/31.8             |
| Sulfisoxazole          | 5.97                 | 268.0               | 87.7/100.2                 | 156.2*/113.0      | 19.6/21.8             |
| Sulfabenzamide         | 7.30                 | 277.1               | 72.9/76.9                  | 156.1*/92.0       | 17.8/38.8             |
| Sulfadimethoxine       | 7.68                 | 311.2               | 55.0/39.8                  | 156.2*/108.1      | 27.4/37.9             |
| Sulfaquinoxaline       | 7.72                 | 301.1               | 38.0/47.9                  | 156.0*/92.1       | 23.2/39.7             |
| Sulfanitran            | 8.51                 | 336.3               | 155.2/153.8                | 156.2*/294.0      | 17.1/16.9             |

\* Quantitative ion.

**Table S3** Matrix effects of the sulfonamide antibiotics in eggs.

| Compounds              | ME (%)         |        |
|------------------------|----------------|--------|
|                        | Surface waters | Eggs   |
| Sulfamethoxypyridazine | 110.04         | 84.39  |
| Sulfameter             | 109.11         | 82.70  |
| Sulfamonomethoxine     | 110.94         | 81.18  |
| Sulfachloropyridazine  | 105.97         | 94.49  |
| Sulfadoxine            | 112.35         | 95.22  |
| Sulfamethoxazole       | 106.72         | 101.29 |
| Sulfisoxazole          | 98.88          | 106.01 |
| Sulfabenzamide         | 103.41         | 109.08 |
| Sulfadimethoxine       | 98.82          | 115.57 |
| Sulfaquinoxaline       | 106.68         | 112.07 |
| Sulfanitran            | 91.36          | 98.36  |

**Table S4** The recoveries and RSDs of 11 kinds of SAs in surface waters (n=7).

| Compounds              | Spike level                       |         | Spike level                       |         | Spike level                        |         |
|------------------------|-----------------------------------|---------|-----------------------------------|---------|------------------------------------|---------|
|                        | 2 $\mu\text{g}\cdot\text{L}^{-1}$ |         | 4 $\mu\text{g}\cdot\text{L}^{-1}$ |         | 20 $\mu\text{g}\cdot\text{L}^{-1}$ |         |
|                        | Recovery (%)                      | RSD (%) | Recovery (%)                      | RSD (%) | Recovery (%)                       | RSD (%) |
| Sulfamethoxypyridazine | 89.4                              | 4.07    | 96.6                              | 2.18    | 81.5                               | 1.59    |
| Sulfameter             | 80.4                              | 3.66    | 91.0                              | 3.12    | 83.6                               | 1.55    |
| Sulfamonomethoxine     | 85.4                              | 3.90    | 92.9                              | 2.49    | 79.2                               | 2.10    |
| Sulfachloropyridazine  | 86.8                              | 4.04    | 99.4                              | 3.19    | 92.6                               | 2.27    |
| Sulfadoxine            | 82.4                              | 4.22    | 93.1                              | 3.48    | 84.5                               | 2.01    |
| Sulfamethoxazole       | 78.5                              | 3.78    | 87.1                              | 3.30    | 76.3                               | 2.87    |
| Sulfisoxazole          | 79.2                              | 3.14    | 82.2                              | 2.55    | 76.6                               | 4.39    |
| Sulfabenzamide         | 74.3                              | 3.24    | 82.2                              | 1.86    | 78.1                               | 2.96    |
| Sulfadimethoxine       | 87.6                              | 4.43    | 96.6                              | 2.05    | 94.4                               | 3.25    |
| Sulfaquinoxaline       | 89.4                              | 5.01    | 102.6                             | 3.08    | 94.3                               | 3.68    |
| Sulfanitran            | 93.3                              | 3.65    | 105.0                             | 8.17    | 107.2                              | 4.70    |

**Table S5** The recoveries and RSDs of 11 kinds of SAs in eggs (n=7).

| Compounds              | Spike level                         |         | Spike level                         |         | Spike level                          |         |
|------------------------|-------------------------------------|---------|-------------------------------------|---------|--------------------------------------|---------|
|                        | 10 $\mu\text{g}\cdot\text{kg}^{-1}$ |         | 20 $\mu\text{g}\cdot\text{kg}^{-1}$ |         | 100 $\mu\text{g}\cdot\text{kg}^{-1}$ |         |
|                        | Recovery (%)                        | RSD (%) | Recovery (%)                        | RSD (%) | Recovery (%)                         | RSD (%) |
| Sulfamethoxypyridazine | 77.8                                | 4.62    | 76.4                                | 5.21    | 79.4                                 | 3.50    |
| Sulfameter             | 75.6                                | 2.59    | 77.1                                | 6.56    | 78.7                                 | 2.50    |
| Sulfamonomethoxine     | 75.5                                | 3.20    | 80.1                                | 5.10    | 77.2                                 | 3.29    |
| Sulfachloropyridazine  | 78.8                                | 4.26    | 79.6                                | 2.57    | 75.1                                 | 6.76    |
| Sulfadoxine            | 89.2                                | 2.50    | 84.2                                | 3.65    | 78.2                                 | 7.12    |
| Sulfamethoxazole       | 78.0                                | 5.82    | 76.6                                | 6.36    | 75.9                                 | 3.91    |
| Sulfisoxazole          | 85.1                                | 8.05    | 79.4                                | 6.67    | 76.2                                 | 6.46    |
| Sulfabenzamide         | 83.9                                | 3.82    | 78.2                                | 7.82    | 79.6                                 | 9.56    |
| Sulfadimethoxine       | 97.5                                | 2.68    | 101.3                               | 4.76    | 84.6                                 | 4.76    |
| Sulfaquinoxaline       | 95.6                                | 6.37    | 94.0                                | 3.45    | 80.7                                 | 2.18    |
| Sulfanitran            | 97.7                                | 5.93    | 93.8                                | 7.85    | 102.5                                | 4.65    |

**Fig. S1.** Effects of the main parameters for MSPE and extraction performance of the  $\text{Fe}_3\text{O}_4@\text{SiO}_2@\text{PDE-TATP-COF}$  on the recovery for sulfonamide antibiotics. Note: Error bar shows the standard deviation (n=3). (A) Sample solution pH; (B) Salt concentration; (C) extraction time; (D) the type of the desorption solvents; (E) volume of the desorption solvent; (F) desorption time.

● Sulfamethoxypyridazine ● Sulfameter ● Sulfamonomethoxine ● Sulfachloropyridazine ● Sulfadoxine ● Sulfamethoxazole ● Sulfisoxazole ● Sulfabenzamide ● Sulfadimethoxine ● Sulfaquinoxaline ● Sulfanitran

**Table S6** Adsorption of different types of analytes with Fe<sub>3</sub>O<sub>4</sub>@SiO<sub>2</sub>@PDE-TATP-COF

| Analyses                   |                                           | Log K <sub>ow</sub> <sup>a</sup> | Recovery (%) |
|----------------------------|-------------------------------------------|----------------------------------|--------------|
| Sulfonamide antibiotics    | Sulfamethoxypyridazine                    | 0.32                             | 84.4         |
|                            | Sulfameter                                | 0.42                             | 84.7         |
|                            | Sulfamonomethoxine                        | -0.04                            | 81.9         |
|                            | Sulfachloropyridazine                     | 3.25                             | 89.8         |
|                            | Sulfadoxine                               | 0.34                             | 90.5         |
|                            | Sulfamethoxazole                          | 0.89                             | 78.8         |
|                            | Sulfisoxazole                             | 1.01                             | 84.4         |
|                            | Sulfabenzamide                            | 1.19                             | 83.1         |
|                            | Sulfadimethoxine                          | 1.48                             | 98.5         |
|                            | Sulfaquinoxaline                          | 1.58                             | 104.4        |
|                            | Sulfanitran                               | 4.10                             | 108.7        |
| Nitroimidazole antibiotics | Hydroxymetronidazole                      | -0.9                             | 0.4          |
|                            | 2-Methyl-4-nitroimidazole                 | 1.15                             | 8.1          |
|                            | 2-Dimethyl-5-nitro-1H-imidazole-1-ethanol | 0.33                             | 9.5          |
| Quinolone antibiotics      | Pipemidic acid                            | -0.16                            | 13.1         |
|                            | Norfloxacin                               | 0.82                             | 11.3         |

<sup>a</sup>Log K<sub>ow</sub>: octanol/water partition coefficient.

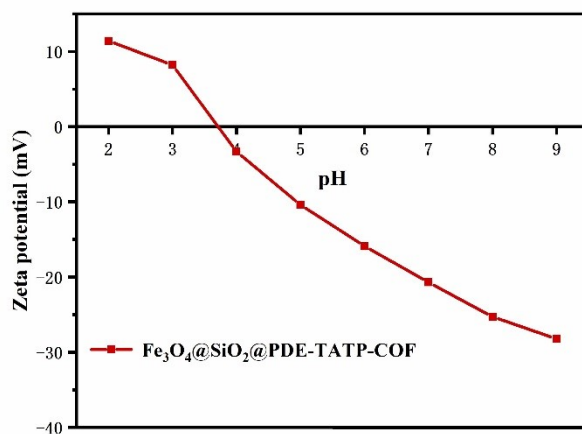

**Fig.S2.** Characterization of Zeta potential the  $\text{Fe}_3\text{O}_4@\text{SiO}_2@\text{PDE-TAPB-COF}$
